# Supplementary material for: The incidence of acute respiratory infection in Indonesian infants and association with vitamin D deficiency
Source: PubMed Central journal article supplement (PMC7987198; doi:10.1371/journal.pone.0248722), 2021-03-23
Supplement: pone.0248722.s001.pdf [file pone.0248722.s001.pdf]

## QUESTIONNAIRE 1 (Age 0-4 weeks)

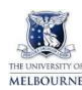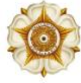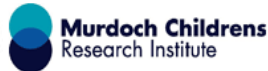

### The Burden Of Pneumonia In Indonesia Children And The Association With Vitamin D Deficiency: The Indonesian Pneumonia And Vitamin D Study (I-PADS)

Study ID  /  /  -  / I-PADS

**Instruction:** The study team will verbally administer the questionnaire by interviewing parent. Circle or complete answers that apply

1. Today's date  /  /  (dd/mm/yyyy)
2. Study staff's initial
3. The person answering the question is the  1. Mother  2. Father

#### Demographic details

4. Child's name \_\_\_\_\_
5. Parents' detail
  - 5.1 Parents' name Mother \_\_\_\_\_  
Father \_\_\_\_\_
  - 5.2 Address \_\_\_\_\_  
\_\_\_\_\_
  - 5.3 Phone number Mother   
Father
  - 5.4 Mother's Date of Birth :  /  /  (dd/mm/yyyy)
  - 5.5 Parents' education (please fill out based on the code)  
code: 1: Middle school or less      2: High school  
3: University                              4: Other  
Mother       Father
  - 5.6 Parents' employment status (please fill out based on the code)  
code: 1: Not working      2: student      3: Employee      4: Laborer  
5: House wife      6: Retired      7: Other  
Mother                               Father

6. Alternative contact

Name \_\_\_\_\_

Relationship with the participant \_\_\_\_\_

Address \_\_\_\_\_

Phone number

|  |  |  |  |  |  |  |  |  |  |  |  |
|--|--|--|--|--|--|--|--|--|--|--|--|
|  |  |  |  |  |  |  |  |  |  |  |  |
|--|--|--|--|--|--|--|--|--|--|--|--|

7. Map

(Please draw us your home location from the PHC/ city landmarks)

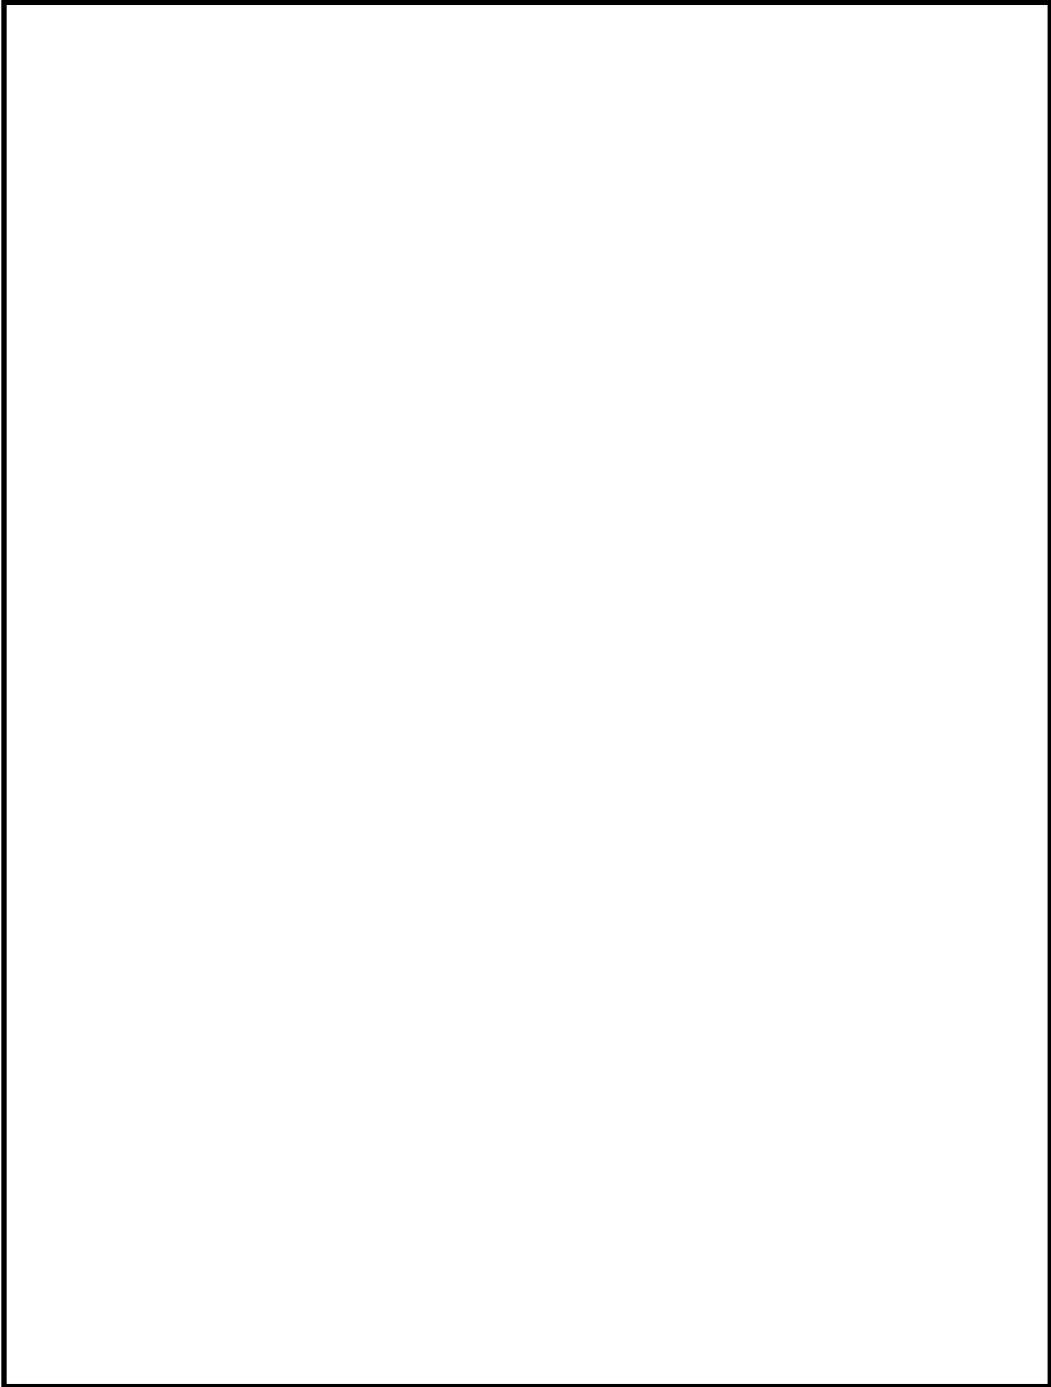

## SOCIO ECONOMIC STATUS

8. Total household monthly income per month. (Please circle the correct response)

- 1. <Rp 500.000,00
- 2. Rp 500.000-Rp1.000.000
- 3. Rp 1.000.000-Rp2.500.000
- 4. Rp 2.500.000-Rp 5.000.000
- 5. >Rp 5.000.000

9. Are you covered by health insurance? (Please circle the correct response)

- 1. Yes
- 2. No

## RISK FACTORS

10. How many people live in the household where the baby lives (not including baby)?

(Please complete the boxes)

people

11. Do any family members currently smoke (in the last 12 months)? (Please put the number that applies)

- 11.1 Mother  1. Not at all 4. Yes at least monthly
- 11.2 Father  2. Yes, daily
- 11.3 Other family member  3. Yes, at least weekly  
*(living in the same roof with baby)*

12. If yes, on average how many cigarettes do you smoke? (Please put the number that applies)

- 12.1 Mother  1. < 12 units
- 12.2 Father  2. 12-24 units
- 12.3 Other family member  3. > 24 units  
*(living in the same roof with baby)*

13. The main material for cooking. (Please circle the correct response)

- 1. Electric 3. Kerosene 5. Charcoal
- 2. Gas 4. Wood 6. Other

The following questions will provide us with information about the mother's pregnancy history. Please kindly circle that apply or fill out the boxes

14. What was the gestational age of the baby at birth?

weeks +  days

15. How many previous pregnancies has the mother had (excluding the most recent). (Please circle the correct response, if the answer is more than 3 please put the number that applies in the boxes)

- 1. none 2. one 3. Two 4. Three 5. >three, mention

16. How many other living children does mother have? (Please circle the correct response, if the answer is more than 3 please put the number that applies in the boxes)

- 1. None 2. One 3. Two 4. Three 5. >three, mention

17. Did the mother take any calcium supplements during her pregnancy? (Please circle the correct response)

1. No      2. Yes, but not regularly      3. Yes, regularly

18. Did mother take any other nutritional supplements? (Please circle the correct response)

1. Yes      2. No

18.1 If yes, please give detail of product name and dosage:

Brand \_\_\_\_\_

Dosage \_\_\_\_\_

18.2 If yes, please give detail of product name and dosage:

Brand \_\_\_\_\_

Dosage \_\_\_\_\_

19. What vitamin D containing foods did the mother take during her pregnancy? (Please circle the correct response and mention the frequency)

| Foods                     | Yes | No | How many times<br>(in average per week) |
|---------------------------|-----|----|-----------------------------------------|
| Milk and alternatives     | 1   | 2  | _____ Times/week                        |
| Red Meat and alternatives | 1   | 2  | _____ Times/week                        |
| Fish                      | 1   | 2  | _____ Times/week                        |
| Egg yolk                  | 1   | 2  | _____ Times/week                        |

### Sun exposure

20. How often is the mother being outside of the home during pregnancy? (Please put the number that applies) (silakan isikan nomor sesuai jawaban)

20.1 **On weekdays**      1. Yes, \_\_\_\_\_ times/week      2. No

20.2 **On weekend**      1. Yes, \_\_\_\_\_ times/week      2. No

21. At what time of the day did the mother usually take go outside the house during pregnancy? (Please put the number that applies)

| No   | Hour                           | On Weekdays | On Weekend |
|------|--------------------------------|-------------|------------|
| 21.1 | Before 10.00 am                |             |            |
| 21.2 | Between 10.00 am –<br>16.00 pm |             |            |
| 21.3 | After 16.00 pm                 |             |            |

22. On average, how many hours was the mother staying outside during pregnancy? (Please put the number that applies)

22.1 On a weekday

22.2 On a weekend

1. Less than 15 min      4. 1 to 2 hours

5. 4 to 5 hours

2. 15 min to 30 min      5.2 to 3 hours

6. 5 to 6 hours

3. 31 min to 1 hour

23. How often did mother use sun protector during pregnancy? (Please circle the correct response)

23.1 Sun screen usage

| No | Usage             | Weekdays | Weekend |
|----|-------------------|----------|---------|
| 1  | Always            |          |         |
| 2  | < 50% of the time |          |         |
| 3  | ≥ 50% of the time |          |         |
| 4  | Not at all        |          |         |

23.2 Sunglasses usage

| No | Usage             | Weekdays | Weekend |
|----|-------------------|----------|---------|
| 1  | Always            |          |         |
| 2  | < 50% of the time |          |         |
| 3  | ≥ 50% of the time |          |         |
| 4  | Not at all        |          |         |

23.3 Umbrella usage

| No | Usage             | Weekdays | Weekend |
|----|-------------------|----------|---------|
| 1  | Always            |          |         |
| 2  | < 50% of the time |          |         |
| 3  | ≥ 50% of the time |          |         |
| 4  | Not at all        |          |         |

24. What was the mother wearing during outdoor activities during pregnancy? (Please circle the correct response)

24.1 Arms exposed

| No | Arms               | On weekday | On weekend |
|----|--------------------|------------|------------|
| 1  | Not exposed at all |            |            |
| 2  | < 50% time exposed |            |            |
| 3  | ≥ 50% time exposed |            |            |
| 4  | Always exposed     |            |            |

24.2 Lower extremity exposed (thigh to heel)

| No | Lower extremity    | On weekday | On weekend |
|----|--------------------|------------|------------|
| 1  | Not exposed at all |            |            |
| 2  | < 50% time exposed |            |            |
| 3  | ≥ 50% time exposed |            |            |
| 4  | Always exposed     |            |            |

25. Does the mother intend to exclusively breastfeed her baby? (Please circle the correct response)

1. Yes            2. No

26. Who is the primary caregiver of the baby? (Please circle the correct response)

1. Mother            2. Father            3. Other family member            4. Babysitter  
5. Others, please mention \_\_\_\_\_

## KUESIONER 1 (Usia 0-4 minggu)

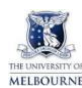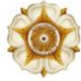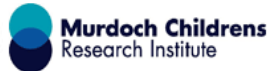

### Beban Penyakit Pneumonia pada Anak-anak di Indonesia dan Hubungan dengan Defisiensi Vitamin D: Penelitian Indonesian Pneumonia and Vitamin D (I-PAD)

ID Peserta   /     /  -    / I-PADS

**Petunjuk:** Tim peneliti akan mewawancarai secara verbal kepada orangtua. Lingkari atau lengkapi pertanyaan yang tersedia

1. Tanggal hari ini   /   /    (dd/mm/yyyy)
2. Inisial pewawancara
3. Pertanyaan dijawab oleh 1. Ibu 2. Bapak

#### Data Demografi

4. Nama Bayi \_\_\_\_\_
5. Data Orangtua
  - 5.1 Nama Orangtua Ibu : \_\_\_\_\_  
Bapak : \_\_\_\_\_
  - 5.2 Alamat : \_\_\_\_\_  
\_\_\_\_\_
  - 5.3 Nomor telepon Ibu              
Bapak
  - 5.4 Tanggal lahir ibu :   /   /    (dd/mm/yyyy)
  - 5.5 Pendidikan orangtua (isilah kotak berdasarkan kode yang tersedia)  
kode: 1: SMP atau dibawahnya 2: SMA atau sederajat  
3: Universitas atau sederajat 4: Lain-lain  
Ibu  Bapak
  - 5.6 Status pekerjaan orangtua (isilah kotak berdasarkan kode yang tersedia)  
kode: 1: Tidak berkerja 2: Siswa 3: Pegawai 4: Buruh  
5: IRT 6: Pensiunan 7: lain-lain  
Ibu  Bapak

6. Kontak Alternatif

Nama : \_\_\_\_\_  
Hubungan dengan peserta: \_\_\_\_\_  
Alamat : \_\_\_\_\_  
\_\_\_\_\_

Nomor Telepon

|  |  |  |  |  |  |  |  |  |  |  |  |  |  |  |  |  |  |  |  |  |
|--|--|--|--|--|--|--|--|--|--|--|--|--|--|--|--|--|--|--|--|--|
|  |  |  |  |  |  |  |  |  |  |  |  |  |  |  |  |  |  |  |  |  |
|--|--|--|--|--|--|--|--|--|--|--|--|--|--|--|--|--|--|--|--|--|

7. Peta

(gambar peta lokasi rumah Anda dari puskesmas/BPM)

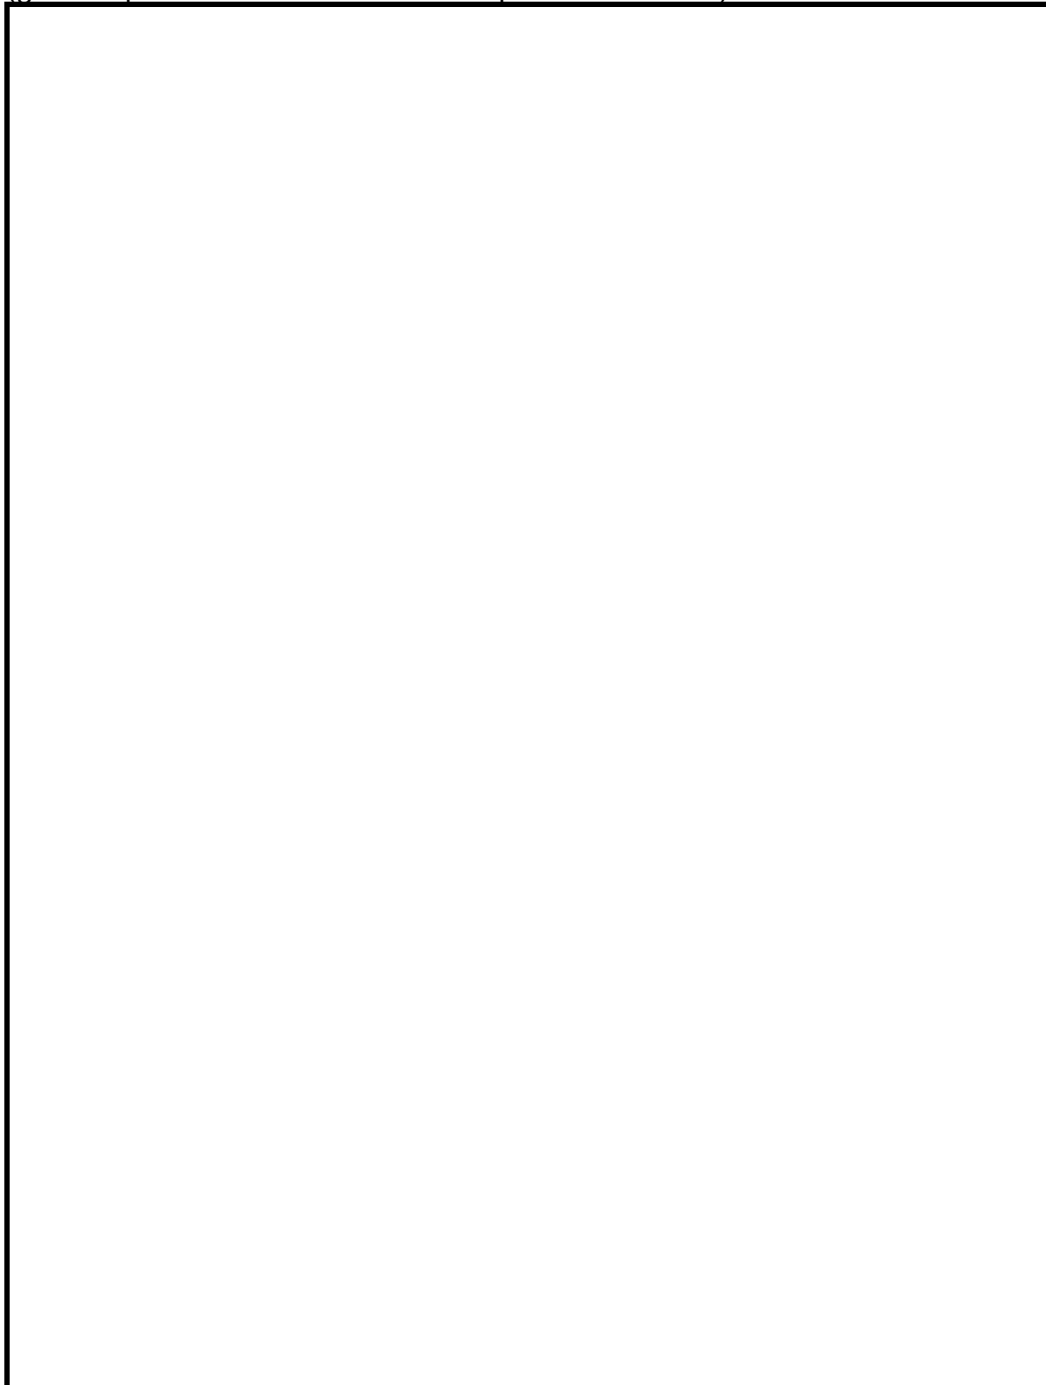

### STATUS SOSIAL EKONOMI

8. Berapa total pendapatan perbulan?(lingkari jawaban yang sesuai)
- |                             |                              |
|-----------------------------|------------------------------|
| 1. <Rp 500.000,00           | 4. Rp 2.500.000-Rp 5.000.000 |
| 2. Rp 500.000-Rp1.000.000   | 5. >Rp 5.000.000             |
| 3. Rp 1.000.000-Rp2.500.000 |                              |
9. Apakah Anda memiliki asuransi kesehatan? (lingkari jawaban yang sesuai)
- |       |          |
|-------|----------|
| 1. Ya | 2. Tidak |
|-------|----------|

### FAKTOR RISIKO

10. Berapa banyak orang yang tinggal satu rumah bersama bayi (tidak termasuk bayi)?  
(Lengkapi kotak yang tersedia)  
 orang
11. Apakah ada anggota keluarga yang merokok (dalam 1 tahun)? (isilah berdasarkan kode nomor yang tersedia)
- |                                                                     |                          |                              |                        |
|---------------------------------------------------------------------|--------------------------|------------------------------|------------------------|
| 11.1 Ibu                                                            | <input type="checkbox"/> | 1. Tidak semua               | 4. Ya, minimal 1 bulan |
| 11.2 Bapak                                                          | <input type="checkbox"/> | 2. Ya, setiap hari           |                        |
| 11.3 Anggota keluarga lain<br>(yang tinggal satu rumah dengan anak) | <input type="checkbox"/> | 3. Ya, minimal setiap minggu |                        |
12. Jika iya, berapa rata-rata jumlah rokok yang dikonsumsi? (isilah berdasarkan kode nomor yang tersedia)
- |                                                                     |                          |                 |
|---------------------------------------------------------------------|--------------------------|-----------------|
| 12.1 Ibu                                                            | <input type="checkbox"/> | 1. ≤ 12 batang  |
| 12.2 Bapak                                                          | <input type="checkbox"/> | 2. 13-24 batang |
| 12.3 Anggota keluarga lain<br>(yang tinggal satu rumah dengan anak) | <input type="checkbox"/> | 3. > 24 batang  |
13. Bahan bakar utama untuk memasak. (lingkari jawaban yang sesuai)
- |            |                 |              |
|------------|-----------------|--------------|
| 1. Listrik | 3. Minyak tanah | 5. Arang     |
| 2. Gas     | 4. Kayu         | 6. Lain-lain |

**Pertanyaan berikut akan memberikan informasi tentang riwayat kehamilan ibu. Silakan lingkari atau isi kotak yang tersedia sesuai jawaban.**

14. Berapa umur kehamilan ibu?  
 minggu +  hari
15. Berapa jumlah kehamilan terdahulu (tidak termasuk kehamilan sekarang)? (silakan lingkari jawaban yang sesuai, jika jawaban lebih dari 3 isilah jawaban pada kotak yang tersedia)
- |              |         |        |         |                                                              |
|--------------|---------|--------|---------|--------------------------------------------------------------|
| 1. Tidak ada | 2. Satu | 3. Dua | 4. Tiga | 5. >Tiga, sebutkan <input type="text"/> <input type="text"/> |
|--------------|---------|--------|---------|--------------------------------------------------------------|
16. Berapa banyak jumlah anak ibu yang hidup? (silakan lingkari jawaban yang sesuai, jika jawaban lebih dari 3 isilah jawaban pada kotak yang tersedia)
- |              |         |        |         |                                                              |
|--------------|---------|--------|---------|--------------------------------------------------------------|
| 1. Tidak ada | 2. Satu | 3. Dua | 4. Tiga | 5. >Tiga, sebutkan <input type="text"/> <input type="text"/> |
|--------------|---------|--------|---------|--------------------------------------------------------------|



17. Apakah ibu mengonsumsi suplemen kalsium selama kehamilan? (silakan lingkari jawaban yang sesuai)

1. Tidak                      2. Ya, tetapi tidak rutin                      3. Ya, rutin

18. Apakah ibu mengonsumsi suplemen nutrisi yang lain? (silakan lingkari jawaban yang sesuai)

1. Ya                      2. Tidak

18.1 Jika iya, sebutkan merk/nama produk dan dosisnya:

Merk \_\_\_\_\_  
Dosis \_\_\_\_\_

18.2 Jika iya, sebutkan merk/nama produk dan dosisnya:

Merk \_\_\_\_\_  
Dosis \_\_\_\_\_

19. Makanan apa yang mengandung vitamin D yang dikonsumsi ibu selama kehamilan? (silakan lingkari jawaban yang sesuai dan sebutkan jadwalnya)

| Makanan      | Ya | Tidak | Rata-rata konsumsi dalam 1 minggu |
|--------------|----|-------|-----------------------------------|
| Susu         | 1  | 2     | _____ kali/minggu                 |
| Daging merah | 1  | 2     | _____ kali/minggu                 |
| Ikan         | 1  | 2     | _____ kali/minggu                 |
| Kuning telur | 1  | 2     | _____ kali/minggu                 |

**Paparan sinar matahari**

20. Seberapa sering ibu berada di luar rumah selama kehamilan? (silakan isikan nomor sesuai jawaban)

- 20.1 **Pada hari kerja**                      1. Ya, \_\_\_\_\_ kali/minggu                      2. Tidak  
20.2 **Pada akhir pekan**                      1. Ya, \_\_\_\_\_ kali/minggu                      2. Tidak

21. Kapan biasanya ibu berada di luar rumah selama kehamilan? (silakan beri tanda centang pada jawaban yang sesuai)

| No   | Jam                      | Pada hari Kerja | Pada akhir pekan |
|------|--------------------------|-----------------|------------------|
| 21.1 | Sebelum jam 10.00        |                 |                  |
| 21.2 | Antara jam 10.00 – 16.00 |                 |                  |
| 21.3 | Setelah jam 16.00        |                 |                  |

22. Rata-rata berapa lama ibu biasa berada di luar rumah di bawah matahari langsung selama kehamilan? (silakan isikan nomor sesuai jawaban)

- 22.1 **Pada hari kerja**                                            22.2 **Pada akhir pekan**

1. kurang dari 15 menit                      4. 2 jam                      6. 4 jam  
2. 15 - 30 menit                      5. 3 jam                      7. 5 jam  
3. 31 menit - 1 jam

23. Seberapa sering ibu memakai pelindung matahari selama kehamilan? (silakan beri tanda centang pada jawaban yang sesuai)

23.1 Penggunaan tabir surya

| No | Penggunaan                            | Pada hari Kerja | Pada akhir pekan |
|----|---------------------------------------|-----------------|------------------|
| 1  | Selalu menggunakan                    |                 |                  |
| 2  | Menggunakan < 50% waktu terpapar      |                 |                  |
| 3  | Menggunakan $\geq$ 50% waktu terpapar |                 |                  |
| 4  | Tidak menggunakan sama sekali         |                 |                  |

23.2 Penggunaan kacamata hitam

| No | Penggunaan                            | Pada hari Kerja | Pada akhir pekan |
|----|---------------------------------------|-----------------|------------------|
| 1  | Selalu menggunakan                    |                 |                  |
| 2  | Menggunakan < 50% waktu terpapar      |                 |                  |
| 3  | Menggunakan $\geq$ 50% waktu terpapar |                 |                  |
| 4  | Tidak menggunakan sama sekali         |                 |                  |

23.3 Penggunaan payung

| No | Penggunaan                            | Pada hari Kerja | Pada akhir pekan |
|----|---------------------------------------|-----------------|------------------|
| 1  | Selalu menggunakan                    |                 |                  |
| 2  | Menggunakan < 50% waktu terpapar      |                 |                  |
| 3  | Menggunakan $\geq$ 50% waktu terpapar |                 |                  |
| 4  | Tidak menggunakan sama sekali         |                 |                  |

24. Bagaimanakah kebiasaan berpakaian ibu ketika berada di luar rumah selama kehamilan? (silakan beri tanda centang pada jawaban yang sesuai)

24.1 Terekspos bagian lengan

| No | Bagian Lengan              | Pada hari Kerja | Pada akhir pekan |
|----|----------------------------|-----------------|------------------|
| 1  | Tidak terpapar sama sekali |                 |                  |
| 2  | < 50% waktu terpapar       |                 |                  |
| 3  | $\geq$ 50% waktu terpapar  |                 |                  |
| 4  | Selalu terpapar            |                 |                  |

24.2 Terekspos bagian ekstremitas bawah (paha hingga tumit)

| No | Bagian ekstremitas bawah   | Pada hari Kerja | Pada akhir pekan |
|----|----------------------------|-----------------|------------------|
| 1  | Tidak terpapar sama sekali |                 |                  |
| 2  | < 50% waktu terpapar       |                 |                  |
| 3  | $\geq$ 50% waktu terpapar  |                 |                  |
| 4  | Selalu terpapar            |                 |                  |

25. Apakah ibu berniat untuk menyusui bayinya secara eksklusif? (silakan lingkari jawaban yang sesuai)

1. Ya                      2. Tidak

26. Siapakah yang menjadi pengasuh utama bayi? (silakan lingkari jawaban yang sesuai)

1. Ibu                      2. Ayah                      3. Keluarga lain                      4. Pengasuh bayi/Babysitter  
5. Lainnya, sebutkan \_\_\_\_\_

**IPADS COMMUNITY : EPISODES OF ACUTE RESPIRATORY ILLNESSES (ARI)**

ID   /     /  -

MR :

Form No :

Baby Name: \_\_\_\_\_

DOB   /   /

|                                               |  | Episode 1 |  | Episode 2 |  | Episode 3 |  | Episode 4 |  | Episode 5 |  | Episode 6 |  | Episode 7 |  | Episode 8 |  | Episode 9 |  | Episode 10 |  |
|-----------------------------------------------|--|-----------|--|-----------|--|-----------|--|-----------|--|-----------|--|-----------|--|-----------|--|-----------|--|-----------|--|------------|--|
| Age in months                                 |  |           |  |           |  |           |  |           |  |           |  |           |  |           |  |           |  |           |  |            |  |
| Diagnosis: 1. Doctor diagnosed pneumonia/LRTI |  | 1         |  | 1         |  | 1         |  | 1         |  | 1         |  | 1         |  | 1         |  | 1         |  | 1         |  | 1          |  |
| 2. URTI                                       |  | 2         |  | 2         |  | 2         |  | 2         |  | 2         |  | 2         |  | 2         |  | 2         |  | 2         |  | 2          |  |
| 3. Other dx, mention                          |  | 3         |  | 3         |  | 3         |  | 3         |  | 3         |  | 3         |  | 3         |  | 3         |  | 3         |  | 3          |  |
| Source of information:                        |  |           |  |           |  |           |  |           |  |           |  |           |  |           |  |           |  |           |  |            |  |
| 1. Parents self-report                        |  | 1         |  | 1         |  | 1         |  | 1         |  | 1         |  | 1         |  | 1         |  | 1         |  | 1         |  | 1          |  |
| 2. Medical record/doctor/nurse                |  | 2         |  | 2         |  | 2         |  | 2         |  | 2         |  | 2         |  | 2         |  | 2         |  | 2         |  | 2          |  |
| 3. Both                                       |  | 3         |  | 3         |  | 3         |  | 3         |  | 3         |  | 3         |  | 3         |  | 3         |  | 3         |  | 3          |  |
| Start date                                    |  | / /       |  | / /       |  | / /       |  | / /       |  | / /       |  | / /       |  | / /       |  | / /       |  | / /       |  | / /        |  |
| End date                                      |  | / /       |  | / /       |  | / /       |  | / /       |  | / /       |  | / /       |  | / /       |  | / /       |  | / /       |  | / /        |  |
| Symptom present                               |  |           |  |           |  |           |  |           |  |           |  |           |  |           |  |           |  |           |  |            |  |
| 1. Fever                                      |  | 1         |  | 7         |  | 1         |  | 7         |  | 1         |  | 7         |  | 1         |  | 7         |  | 1         |  | 7          |  |
| 2. Cough                                      |  | 2         |  | 8a        |  | 2         |  | 8a        |  | 2         |  | 8a        |  | 2         |  | 8a        |  | 2         |  | 8a         |  |
| 3. Runny nose                                 |  | 3         |  | 8b        |  | 3         |  | 8b        |  | 3         |  | 8b        |  | 3         |  | 8b        |  | 3         |  | 8b         |  |
| 4. Dyspnea/Fast breathing                     |  | 4         |  | 8c        |  | 4         |  | 8c        |  | 4         |  | 8c        |  | 4         |  | 8c        |  | 4         |  | 8c         |  |
| 5. Chest Indrawing                            |  | 5         |  | 8d        |  | 5         |  | 8d        |  | 5         |  | 8d        |  | 5         |  | 8d        |  | 5         |  | 8d         |  |
| 6. Wheeze                                     |  | 6         |  | 8e        |  | 6         |  | 8e        |  | 6         |  | 8e        |  | 6         |  | 8e        |  | 6         |  | 8e         |  |
| 7. Diarrhea/Vomit                             |  | 7         |  | 9         |  | 7         |  | 9         |  | 7         |  | 9         |  | 7         |  | 9         |  | 7         |  | 9          |  |
| 8. Danger signs                               |  | 8         |  |           |  | 8         |  |           |  | 8         |  |           |  | 8         |  |           |  | 8         |  |            |  |
| a. Unable to drink                            |  | a         |  |           |  | a         |  |           |  | a         |  |           |  | a         |  |           |  | a         |  |            |  |
| b. Vomit everything                           |  | b         |  |           |  | b         |  |           |  | b         |  |           |  | b         |  |           |  | b         |  |            |  |
| c. Unconscious                                |  | c         |  |           |  | c         |  |           |  | c         |  |           |  | c         |  |           |  | c         |  |            |  |
| d. Stridor                                    |  | d         |  |           |  | d         |  |           |  | d         |  |           |  | d         |  |           |  | d         |  |            |  |
| e. Cyanosis                                   |  | e         |  |           |  | e         |  |           |  | e         |  |           |  | e         |  |           |  | e         |  |            |  |
| 9. Other, mention. ...                        |  |           |  |           |  |           |  |           |  |           |  |           |  |           |  |           |  |           |  |            |  |
| Antibiotic                                    |  | 1. Yes    |  | 0. No     |  |           |  |           |  |           |  |           |  |           |  |           |  |           |  |            |  |
| a. Cotrimoxazole                              |  | a         |  | f         |  | a         |  | f         |  | a         |  | f         |  | a         |  | f         |  | a         |  | f          |  |
| b. Erythromycin                               |  | b         |  | g         |  | b         |  | g         |  | b         |  | g         |  | b         |  | g         |  | b         |  | g          |  |
| c. Cefotaxime                                 |  | c         |  | h         |  | c         |  | h         |  | c         |  | h         |  | c         |  | h         |  | c         |  | h          |  |
| d. Penicillin                                 |  | d         |  | i         |  | d         |  | i         |  | d         |  | i         |  | d         |  | i         |  | d         |  | i          |  |
| e. Ampicillin                                 |  | e         |  | j         |  | e         |  | j         |  | e         |  | j         |  | e         |  | j         |  | e         |  | j          |  |
| f. Amoxicillin                                |  | f         |  |           |  | f         |  |           |  | f         |  |           |  | f         |  |           |  | f         |  |            |  |
| g. Gentamycine                                |  | g         |  |           |  | g         |  |           |  | g         |  |           |  | g         |  |           |  | g         |  |            |  |
| h. Amoxicillin clavulanat                     |  | h         |  |           |  | h         |  |           |  | h         |  |           |  | h         |  |           |  | h         |  |            |  |
| i. Ceftriaxone                                |  | i         |  |           |  | i         |  |           |  | i         |  |           |  | i         |  |           |  | i         |  |            |  |
| j. others, mention,                           |  | j         |  |           |  | j         |  |           |  | j         |  |           |  | j         |  |           |  | j         |  |            |  |
| Mention other antibiotics                     |  |           |  |           |  |           |  |           |  |           |  |           |  |           |  |           |  |           |  |            |  |
| Nebulized: B2 agonist                         |  | 1. Yes    |  | 0. No     |  |           |  |           |  |           |  |           |  |           |  |           |  |           |  |            |  |
| Steroid                                       |  | 1. Yes    |  | 0. No     |  |           |  |           |  |           |  |           |  |           |  |           |  |           |  |            |  |
| Cough Medicine, Name _____                    |  | 1. Yes    |  | 0. No     |  |           |  |           |  |           |  |           |  |           |  |           |  |           |  |            |  |
| Oral Salbutamol                               |  | 1. Yes    |  | 0. No     |  |           |  |           |  |           |  |           |  |           |  |           |  |           |  |            |  |
| CTM                                           |  | 1. Yes    |  | 0. No     |  |           |  |           |  |           |  |           |  |           |  |           |  |           |  |            |  |
| Outcome:                                      |  |           |  |           |  |           |  |           |  |           |  |           |  |           |  |           |  |           |  |            |  |
| 1. Self limiting (no treatment)               |  | 1         |  | 1         |  | 1         |  | 1         |  | 1         |  | 1         |  | 1         |  | 1         |  | 1         |  | 1          |  |
| 2. Outpatient, remission                      |  | 2         |  | 2         |  | 2         |  | 2         |  | 2         |  | 2         |  | 2         |  | 2         |  | 2         |  | 2          |  |
| 3. Hospitalisation, cured                     |  | 3         |  | 3         |  | 3         |  | 3         |  | 3         |  | 3         |  | 3         |  | 3         |  | 3         |  | 3          |  |
| 4. Died                                       |  | 4         |  | 4         |  | 4         |  | 4         |  | 4         |  | 4         |  | 4         |  | 4         |  | 4         |  | 4          |  |
| Notes                                         |  |           |  |           |  |           |  |           |  |           |  |           |  |           |  |           |  |           |  |            |  |

**IPADS - KOMUNITAS: EPISODE INFEKSI SAURAN PERNAPASAN AKUT (ISPA)**

ID   /     /  -

No. RM :

No. formulir:

Nama bayi: \_\_\_\_\_ Tanggal lahir   /   /

|                                                    |                                   | Episode 1 | Episode 2 | Episode 3 | Episode 4 | Episode 5 | Episode 6 | Episode 7 | Episode 8 | Episode 9 | Episode 10 |   |    |   |    |   |    |   |    |   |    |
|----------------------------------------------------|-----------------------------------|-----------|-----------|-----------|-----------|-----------|-----------|-----------|-----------|-----------|------------|---|----|---|----|---|----|---|----|---|----|
| Usia dalam bulan                                   |                                   |           |           |           |           |           |           |           |           |           |            |   |    |   |    |   |    |   |    |   |    |
| Diagnosis:                                         |                                   |           |           |           |           |           |           |           |           |           |            |   |    |   |    |   |    |   |    |   |    |
| 1. Diagnosis pneumonia/ISPA bag. bawah oleh dokter |                                   | 1         | 1         | 1         | 1         | 1         | 1         | 1         | 1         | 1         | 1          |   |    |   |    |   |    |   |    |   |    |
| 2. ISPA bag. atas                                  |                                   | 2         | 2         | 2         | 2         | 2         | 2         | 2         | 2         | 2         | 2          |   |    |   |    |   |    |   |    |   |    |
| 3. Diagnosis lainnya, sebutkan                     |                                   | 3         | 3         | 3         | 3         | 3         | 3         | 3         | 3         | 3         | 3          |   |    |   |    |   |    |   |    |   |    |
| Sumber informasi:                                  |                                   |           |           |           |           |           |           |           |           |           |            |   |    |   |    |   |    |   |    |   |    |
| 1. Laporan orangtua                                |                                   | 1         | 1         | 1         | 1         | 1         | 1         | 1         | 1         | 1         | 1          |   |    |   |    |   |    |   |    |   |    |
| 2. Rekam medis/ dokter/ perawat                    |                                   | 2         | 2         | 2         | 2         | 2         | 2         | 2         | 2         | 2         | 2          |   |    |   |    |   |    |   |    |   |    |
| 3. Keduanya                                        |                                   | 3         | 3         | 3         | 3         | 3         | 3         | 3         | 3         | 3         | 3          |   |    |   |    |   |    |   |    |   |    |
| Tanggal mulai                                      |                                   | / /       | / /       | / /       | / /       | / /       | / /       | / /       | / /       | / /       | / /        |   |    |   |    |   |    |   |    |   |    |
| Tanggal berakhir                                   |                                   | / /       | / /       | / /       | / /       | / /       | / /       | / /       | / /       | / /       | / /        |   |    |   |    |   |    |   |    |   |    |
| Gejala yang muncul                                 |                                   |           |           |           |           |           |           |           |           |           |            |   |    |   |    |   |    |   |    |   |    |
| 1. Demam                                           | 8. Tanda bahaya                   | 1         | 8a        | 1         | 8a        | 1         | 8a        | 1         | 8a        | 1         | 8a         | 1 | 8a | 1 | 8a | 1 | 8a | 1 | 8a | 1 | 8a |
| 2. Batuk                                           | a. Tidak bisa menyusui            | 2         | 8b        | 2         | 8b        | 2         | 8b        | 2         | 8b        | 2         | 8b         | 2 | 8b | 2 | 8b | 2 | 8b | 2 | 8b | 2 | 8b |
| 3. Hidung meler                                    | b. Memuntahkan semua yang diminum | 3         | 8c        | 3         | 8c        | 3         | 8c        | 3         | 8c        | 3         | 8c         | 3 | 8c | 3 | 8c | 3 | 8c | 3 | 8c | 3 | 8c |
| 4. <i>Dispneu</i> /Napas cepat                     | c. Penurunan kesadaran            | 4         | 8d        | 4         | 8d        | 4         | 8d        | 4         | 8d        | 4         | 8d         | 4 | 8d | 4 | 8d | 4 | 8d | 4 | 8d | 4 | 8d |
| 5. Tarikan dinding dada bawah ke dalam             | d. <i>Stridor</i>                 | 5         | 8e        | 5         | 8e        | 5         | 8e        | 5         | 8e        | 5         | 8e         | 5 | 8e | 5 | 8e | 5 | 8e | 5 | 8e | 5 | 8e |
| 6. Mengi                                           | e. Sianosis                       | 6         | 9         | 6         | 9         | 6         | 9         | 6         | 9         | 6         | 9          | 6 | 9  | 6 | 9  | 6 | 9  | 6 | 9  | 6 | 9  |
| 7. Diare/ muntah                                   |                                   | 7         |           | 7         |           | 7         |           | 7         |           | 7         |            | 7 |    | 7 |    | 7 |    | 7 |    | 7 |    |
| 9. Lainnya, sebutkan ...                           |                                   |           |           |           |           |           |           |           |           |           |            |   |    |   |    |   |    |   |    |   |    |
| Antibiotik                                         | 1. Ya    0. Tidak                 |           |           |           |           |           |           |           |           |           |            |   |    |   |    |   |    |   |    |   |    |
| a. <i>Cotrimoxazole</i>                            | f. <i>Amoxicillin</i>             | a         | f         | a         | f         | a         | f         | a         | f         | a         | f          | a | f  | a | f  | a | f  | a | f  | a | f  |
| b. <i>Erythromycin</i>                             | g. <i>Gentamycine</i>             | b         | g         | b         | g         | b         | g         | b         | g         | b         | g          | b | g  | b | g  | b | g  | b | g  | b | g  |
| c. <i>Cefotaxime</i>                               | h. <i>Amoxicillin clavulanat</i>  | c         | h         | c         | h         | c         | h         | c         | h         | c         | h          | c | h  | c | h  | c | h  | c | h  | c | h  |
| d. <i>Penicillin</i>                               | i. <i>Ceftriaxone</i>             | d         | i         | d         | i         | d         | i         | d         | i         | d         | i          | d | i  | d | i  | d | i  | d | i  | d | i  |
| e. <i>Ampicillin</i>                               | j. Lainnya, sebutkan              | e         | j         | e         | j         | e         | j         | e         | j         | e         | j          | e | j  | e | j  | e | j  | e | j  | e | j  |
| Antibiotik lainnya                                 |                                   |           |           |           |           |           |           |           |           |           |            |   |    |   |    |   |    |   |    |   |    |
| Nebulisasi: <i>B2 agonist</i>                      | 1. Ya    0. Tidak                 |           |           |           |           |           |           |           |           |           |            |   |    |   |    |   |    |   |    |   |    |
| Steroid                                            | 1. Ya    0. Tidak                 |           |           |           |           |           |           |           |           |           |            |   |    |   |    |   |    |   |    |   |    |
| Obat batuk, Nama _____                             | 1. Ya    0. Tidak                 |           |           |           |           |           |           |           |           |           |            |   |    |   |    |   |    |   |    |   |    |
| Salbutamol per oral                                | 1. Ya    0. Tidak                 |           |           |           |           |           |           |           |           |           |            |   |    |   |    |   |    |   |    |   |    |
| CTM                                                | 1. Ya    0. Tidak                 |           |           |           |           |           |           |           |           |           |            |   |    |   |    |   |    |   |    |   |    |
| Hasil akhir:                                       |                                   |           |           |           |           |           |           |           |           |           |            |   |    |   |    |   |    |   |    |   |    |
| 1. Sembuh tanpa pemberian obat                     |                                   | 1         |           | 1         |           | 1         |           | 1         |           | 1         |            | 1 |    | 1 |    | 1 |    | 1 |    | 1 |    |
| 2. Rawat jalan, sembuh                             |                                   | 2         |           | 2         |           | 2         |           | 2         |           | 2         |            | 2 |    | 2 |    | 2 |    | 2 |    | 2 |    |
| 3. Rawat inap, sembuh                              |                                   | 3         |           | 3         |           | 3         |           | 3         |           | 3         |            | 3 |    | 3 |    | 3 |    | 3 |    | 3 |    |
| 4. Meninggal                                       |                                   | 4         |           | 4         |           | 4         |           | 4         |           | 4         |            | 4 |    | 4 |    | 4 |    | 4 |    | 4 |    |
| Catatan tambahan                                   |                                   |           |           |           |           |           |           |           |           |           |            |   |    |   |    |   |    |   |    |   |    |

**IPADS COMMUNITY: GROWTH, FEEDING AND SUN BEHAVIOR**

ID  /     -

MR :

Baby Name: \_\_\_\_\_

DOB  /  /

| Variables                                                                                                    |                                          | Age in months |     |     |     |     |     |     |   |     |     |    |     |
|--------------------------------------------------------------------------------------------------------------|------------------------------------------|---------------|-----|-----|-----|-----|-----|-----|---|-----|-----|----|-----|
|                                                                                                              |                                          | 1             | 2   | 3   | 4   | 5   | 6   | 7   | 8 | 9   | 10  | 11 | 12  |
| FU date                                                                                                      |                                          | / /           | / / | / / | / / | / / | / / | / / |   | / / | / / |    | / / |
| Current weight (in gr)                                                                                       |                                          |               |     |     |     |     |     |     |   |     |     |    |     |
| Current length (in cms)                                                                                      |                                          |               |     |     |     |     |     |     |   |     |     |    |     |
| Arm circumference (in cms)                                                                                   |                                          |               |     |     |     |     |     |     |   |     |     |    |     |
| <b>Feeding</b>                                                                                               |                                          |               |     |     |     |     |     |     |   |     |     |    |     |
| 1. Breastfeed                                                                                                |                                          | 1             | 1   | 1   | 1   | 1   | 1   | 1   |   | 1   | 1   |    | 1   |
| 2. Formula milk                                                                                              |                                          | 2             | 2   | 2   | 2   | 2   | 2   | 2   |   | 2   | 2   |    | 2   |
| 3. Solid food                                                                                                |                                          | 3             | 3   | 3   | 3   | 3   | 3   | 3   |   | 3   | 3   |    | 3   |
| 4. Mineral water or water-based drinks                                                                       |                                          | 4             | 4   | 4   | 4   | 4   | 4   | 4   |   | 4   | 4   |    | 4   |
| 5. Fruit juice and sugar                                                                                     |                                          | 5             | 5   | 5   | 5   | 5   | 5   | 5   |   | 5   | 5   |    | 5   |
| <b>Vitamin D food intake</b>                                                                                 |                                          |               |     |     |     |     |     |     |   |     |     |    |     |
| Milk                                                                                                         | 0. None                                  |               |     |     |     |     |     |     |   |     |     |    |     |
| Red meats                                                                                                    | 1. Once/ month                           |               |     |     |     |     |     |     |   |     |     |    |     |
| Fish                                                                                                         | 2. Once/ week                            |               |     |     |     |     |     |     |   |     |     |    |     |
| Egg yolk                                                                                                     | 3. 2-3/week                              |               |     |     |     |     |     |     |   |     |     |    |     |
|                                                                                                              | 4. 4-5/week                              |               |     |     |     |     |     |     |   |     |     |    |     |
|                                                                                                              | 5. Everyday                              |               |     |     |     |     |     |     |   |     |     |    |     |
| <b>Do you usually take your baby outside the house under the sunlight?</b>                                   |                                          |               |     |     |     |     |     |     |   |     |     |    |     |
| 1. Yes (if yes, please mention how frequent in a weekdays/end)                                               | Weekdays                                 |               |     |     |     |     |     |     |   |     |     |    |     |
| 0. No                                                                                                        | Weekend                                  |               |     |     |     |     |     |     |   |     |     |    |     |
| <b>Take the baby outside the house under the sunlight</b>                                                    |                                          |               |     |     |     |     |     |     |   |     |     |    |     |
| 1. Before 10.00 am                                                                                           | Weekdays                                 |               |     |     |     |     |     |     |   |     |     |    |     |
| 2. Between 10.00 am- 4.00 pm                                                                                 | Weekend                                  |               |     |     |     |     |     |     |   |     |     |    |     |
| 3. After 4.00 pm                                                                                             |                                          |               |     |     |     |     |     |     |   |     |     |    |     |
| <b>When do you usually take your baby outside the house under the sunlight?</b>                              |                                          |               |     |     |     |     |     |     |   |     |     |    |     |
| 1. < 15 minutes                                                                                              | 5. 3 hours                               | Weekdays      |     |     |     |     |     |     |   |     |     |    |     |
| 2. 15-30 minutes                                                                                             | 6. 4 hours                               | Weekend       |     |     |     |     |     |     |   |     |     |    |     |
| 3. 31 minutes - 1hour                                                                                        | 7. 5 hours                               |               |     |     |     |     |     |     |   |     |     |    |     |
| 4. 2 hours                                                                                                   |                                          |               |     |     |     |     |     |     |   |     |     |    |     |
| <b>Baby wear during the time he/she was exposed to the sun:</b>                                              |                                          |               |     |     |     |     |     |     |   |     |     |    |     |
| Sun Exposure:<br>1. Not exposed at all<br>2. <50% time exposed<br>3. ≥ 50% time exposed<br>4. Always exposed | Arms exposed                             | Weekdays      |     |     |     |     |     |     |   |     |     |    |     |
|                                                                                                              |                                          | Weekend       |     |     |     |     |     |     |   |     |     |    |     |
|                                                                                                              | Lower extremity exposed (thigh to heel)  | Weekdays      |     |     |     |     |     |     |   |     |     |    |     |
|                                                                                                              |                                          | Weekend       |     |     |     |     |     |     |   |     |     |    |     |
| Sun Protection:<br>1. Always<br>2. <50% of the time<br>3. ≥ 50% of the time<br>4. Not at all                 | Sunscreen usage                          | Weekdays      |     |     |     |     |     |     |   |     |     |    |     |
|                                                                                                              |                                          | Weekend       |     |     |     |     |     |     |   |     |     |    |     |
|                                                                                                              | Sunglasses usage                         | Weekdays      |     |     |     |     |     |     |   |     |     |    |     |
|                                                                                                              |                                          | Weekend       |     |     |     |     |     |     |   |     |     |    |     |
|                                                                                                              | Umbrella usage                           | Weekdays      |     |     |     |     |     |     |   |     |     |    |     |
|                                                                                                              |                                          | Weekend       |     |     |     |     |     |     |   |     |     |    |     |
| Baby go to a daycare                                                                                         | 1. Yes, at what age (in months) 2. No    |               |     |     |     |     |     |     |   |     |     |    |     |
| Baby's primary caregiver                                                                                     | 1. Mother 3. Other, mention<br>2. Father |               |     |     |     |     |     |     |   |     |     |    |     |

**IPADS - KOMUNITAS: PERTUMBUHAN, ASUPAN DAN PERILAKU BERJEMUR**

ID  /  -

No. RM :

Nama Bayi : \_\_\_\_\_

Tgl. Lahir  /  /

| Variabel                                                                                                                                                    | Usia dalam bulan                                  |    |             |    |    |    |    |   |    |    |    |    |
|-------------------------------------------------------------------------------------------------------------------------------------------------------------|---------------------------------------------------|----|-------------|----|----|----|----|---|----|----|----|----|
|                                                                                                                                                             | 1                                                 | 2  | 3           | 4  | 5  | 6  | 7  | 8 | 9  | 10 | 11 | 12 |
| Tanggal wawancara                                                                                                                                           | //                                                | // | //          | // | // | // | // |   | // | // |    | // |
| Berat badan saat wawancara (gram)                                                                                                                           |                                                   |    |             |    |    |    |    |   |    |    |    |    |
| Pandang badan saat wawancara (cm)                                                                                                                           |                                                   |    |             |    |    |    |    |   |    |    |    |    |
| Lingkar lengan atas saat wawancara (cm)                                                                                                                     |                                                   |    |             |    |    |    |    |   |    |    |    |    |
| <b>Asupan</b>                                                                                                                                               |                                                   |    |             |    |    |    |    |   |    |    |    |    |
| 1. Air Susu Ibu                                                                                                                                             | 1                                                 | 1  | 1           | 1  | 1  | 1  | 1  |   | 1  | 1  |    | 1  |
| 2. Susu formula                                                                                                                                             | 2                                                 | 2  | 2           | 2  | 2  | 2  | 2  |   | 2  | 2  |    | 2  |
| 3. Makanan padat                                                                                                                                            | 3                                                 | 3  | 3           | 3  | 3  | 3  | 3  |   | 3  | 3  |    | 3  |
| 4. Air mineral atau minumam lainnya                                                                                                                         | 4                                                 | 4  | 4           | 4  | 4  | 4  | 4  |   | 4  | 4  |    | 4  |
| 5. Jus buah and gula                                                                                                                                        | 5                                                 | 5  | 5           | 5  | 5  | 5  | 5  |   | 5  | 5  |    | 5  |
| <b>Asupan makanan sumber vitamin D</b>                                                                                                                      |                                                   |    |             |    |    |    |    |   |    |    |    |    |
| Susu                                                                                                                                                        |                                                   |    |             |    |    |    |    |   |    |    |    |    |
| Daging merah                                                                                                                                                |                                                   |    |             |    |    |    |    |   |    |    |    |    |
| Ikan                                                                                                                                                        |                                                   |    |             |    |    |    |    |   |    |    |    |    |
| Kuning telur                                                                                                                                                |                                                   |    |             |    |    |    |    |   |    |    |    |    |
| 0. Tidak pernah<br>1. 1x/bulan<br>2. 1x/minggu<br>3. 2-3x/minggu<br>4. 4-5x/minggu<br>5. Setiap hari                                                        |                                                   |    |             |    |    |    |    |   |    |    |    |    |
| Apakah Anda biasanya mengajak bayi Anda keluar rumah dan terpapar sinar matahari?                                                                           |                                                   |    |             |    |    |    |    |   |    |    |    |    |
| 1. Ya (jika Ya, seberapa sering dilakukan pada hari kerja atau akhir pekan?)                                                                                | Hari kerja                                        |    |             |    |    |    |    |   |    |    |    |    |
| 0. Tidak                                                                                                                                                    | Akhir pekan                                       |    |             |    |    |    |    |   |    |    |    |    |
| Kapankah Anda biasanya mengajak bayi Anda keluar rumah dan terpapar sinar matahari?                                                                         |                                                   |    |             |    |    |    |    |   |    |    |    |    |
| 1. Sebelum pukul 10.00 WIB                                                                                                                                  | Hari kerja                                        |    |             |    |    |    |    |   |    |    |    |    |
| 2. Antara pukul 10.00 dan 16.00 WIB                                                                                                                         | Akhir pekan                                       |    |             |    |    |    |    |   |    |    |    |    |
| 3. Setelah 4.00 WIB                                                                                                                                         |                                                   |    |             |    |    |    |    |   |    |    |    |    |
| Berapa lama Anda biasanya mengajak bayi Anda keluar rumah dan terpapar sinar matahari?                                                                      |                                                   |    |             |    |    |    |    |   |    |    |    |    |
| 1. < 15 menit                                                                                                                                               | 5. 3 jam                                          |    |             |    |    |    |    |   |    |    |    |    |
| 2. 15-30 menit                                                                                                                                              | 6. 4 jam                                          |    |             |    |    |    |    |   |    |    |    |    |
| 3. 31 menit - 1 jam                                                                                                                                         | 7. 5 jam                                          |    |             |    |    |    |    |   |    |    |    |    |
| 4. 2 jam                                                                                                                                                    |                                                   |    |             |    |    |    |    |   |    |    |    |    |
| Seberapa sering bagian lengan dan kaki bayi Anda terpapar sinar matahari pada saat keluar rumah?                                                            |                                                   |    |             |    |    |    |    |   |    |    |    |    |
| Frekuensi paparan sinar matahari:<br>1. Tidak pernah terpapar<br>2. <50% dari waktu terpapar<br>3. ≥ 50% dari waktu terpapar<br>4. Selalu terpapar          | Bagian lengan                                     |    | Hari kerja  |    |    |    |    |   |    |    |    |    |
|                                                                                                                                                             | Bagian kaki (paha hingga tumit/ujung kaki)        |    | Akhir pekan |    |    |    |    |   |    |    |    |    |
|                                                                                                                                                             |                                                   |    | Hari kerja  |    |    |    |    |   |    |    |    |    |
|                                                                                                                                                             |                                                   |    | Akhir pekan |    |    |    |    |   |    |    |    |    |
| Bagaimanakah upaya Anda melindungi bayi Anda dari paparan sinar matahari pada saat keluar rumah?                                                            |                                                   |    |             |    |    |    |    |   |    |    |    |    |
| Upaya melindungi tubuh bayi dari sinar matahari:<br>1. Selalu<br>2. <50% dari waktu terpapar<br>3. ≥ 50% dari waktu terpapar<br>4. Tidak pernah sama sekali | Penggunaan tabir surya                            |    | Hari kerja  |    |    |    |    |   |    |    |    |    |
|                                                                                                                                                             |                                                   |    | Akhir pekan |    |    |    |    |   |    |    |    |    |
|                                                                                                                                                             | Penggunaan kaca mata hitam                        |    | Hari kerja  |    |    |    |    |   |    |    |    |    |
|                                                                                                                                                             |                                                   |    | Akhir pekan |    |    |    |    |   |    |    |    |    |
|                                                                                                                                                             | Penggunaan payung                                 |    | Hari kerja  |    |    |    |    |   |    |    |    |    |
|                                                                                                                                                             |                                                   |    | Akhir pekan |    |    |    |    |   |    |    |    |    |
| Apakah bayi Anda mengikuti PAUD/ Tempat penitipan anak?                                                                                                     | 1. Jika Ya, sebutkan usia dalam bulan<br>2. Tidak |    |             |    |    |    |    |   |    |    |    |    |
| Pengasuh utama bayi                                                                                                                                         | 1. Ibu 2. Bapak 3. Lainnya, sebutkan              |    |             |    |    |    |    |   |    |    |    |    |

**STANDARDISED CLINICAL RECORD**

**Date of visit** :   /   /     dd/mm/yyyy  
**Child's name** : \_\_\_\_\_  
**Participant's ID** :   /     /  -    / I-PADS  
**DOB** :   /   /     dd/mm/yyyy

**No. MR** :                   
**Site** : PHC...../ Midwife clinic.....  
**Age** :   months/years old (circle appropriate answer)

**Doctor's name** : \_\_\_\_\_  
**Signature** : \_\_\_\_\_

**Instruction: Please complete this form and leave it in child's medical record in primary health care center or midwife clinic!**

| Main Symptom(s)                                                                                                                                                                                                                                                                                                                                                                                                                                                                                                                                                                                                                                                                                                                                                                                                      | Danger Sign                                                                                                                                                                                                                                                                                                                                | Body Weight                                                                                                                                                     | Examination                                                                                                                                                                                                                                                                                                                                        | Classification                                                                                                                                                      | Therapy                                                                                                                                                                                                                                                                                                                                    |
|----------------------------------------------------------------------------------------------------------------------------------------------------------------------------------------------------------------------------------------------------------------------------------------------------------------------------------------------------------------------------------------------------------------------------------------------------------------------------------------------------------------------------------------------------------------------------------------------------------------------------------------------------------------------------------------------------------------------------------------------------------------------------------------------------------------------|--------------------------------------------------------------------------------------------------------------------------------------------------------------------------------------------------------------------------------------------------------------------------------------------------------------------------------------------|-----------------------------------------------------------------------------------------------------------------------------------------------------------------|----------------------------------------------------------------------------------------------------------------------------------------------------------------------------------------------------------------------------------------------------------------------------------------------------------------------------------------------------|---------------------------------------------------------------------------------------------------------------------------------------------------------------------|--------------------------------------------------------------------------------------------------------------------------------------------------------------------------------------------------------------------------------------------------------------------------------------------------------------------------------------------|
| <input type="checkbox"/> Fever <input type="text"/> <input type="text"/> <input type="text"/> day(s) ago<br><input type="checkbox"/> Runny nose <input type="text"/> <input type="text"/> <input type="text"/> day(s) ago<br><input type="checkbox"/> Cough <input type="text"/> <input type="text"/> <input type="text"/> day(s) ago<br><input type="checkbox"/> Fast breathing* <input type="text"/> <input type="text"/> <input type="text"/> day(s) ago<br><input type="checkbox"/> Wheeze <input type="text"/> <input type="text"/> <input type="text"/> day(s) ago<br><input type="checkbox"/> Diarrhea <input type="text"/> <input type="text"/> <input type="text"/> day(s) ago<br><input type="checkbox"/> Others, _____ <input type="text"/> <input type="text"/> <input type="text"/> day(s) ago<br>_____ | <input type="checkbox"/> None<br><input type="checkbox"/> Unable to drink/feed<br><input type="checkbox"/> Vomit everything<br><input type="checkbox"/> Lethargic/unconscious<br><input type="checkbox"/> Stridor<br><input type="checkbox"/> Cyanosis<br><input type="checkbox"/> Underweight<br><input type="checkbox"/> Others<br>_____ | <input type="text"/> <input type="text"/> <input type="text"/> Kgs<br><hr/> <b>Length</b><br><input type="text"/> <input type="text"/> <input type="text"/> cms | <b>Respiratory rate in 60 seconds:</b><br><b>1st count*:</b> <input type="text"/> <input type="text"/> <input type="text"/> /min<br><b>2<sup>nd</sup> count (if increases)*:</b> <input type="text"/> <input type="text"/> <input type="text"/> /min<br><br><b>Chest indrawing:</b><br><input type="checkbox"/> Yes<br><input type="checkbox"/> No | <input type="checkbox"/> Not pneumonia<br><input type="checkbox"/> Pneumonia<br><input type="checkbox"/> Severe Pneumonia<br><input type="checkbox"/> Others, _____ | <input type="checkbox"/> Cough medicine, mention _____<br><input type="checkbox"/> Antibiotic<br><input type="checkbox"/> Oral salbutamol<br><input type="checkbox"/> Inhalation salbutamol<br><input type="checkbox"/> Steroid<br><input type="checkbox"/> Zinc<br><input type="checkbox"/> ORS<br><input type="checkbox"/> Others, _____ |
| <b>Follow up plan:</b> <input type="checkbox"/> Outpatient <input type="checkbox"/> Hospitalised <input type="checkbox"/> Referred                                                                                                                                                                                                                                                                                                                                                                                                                                                                                                                                                                                                                                                                                   |                                                                                                                                                                                                                                                                                                                                            | <b>Place for follow up plan:</b> _____                                                                                                                          |                                                                                                                                                                                                                                                                                                                                                    | <b>Research Assistant's name:</b> _____<br><b>Signature:</b> _____                                                                                                  |                                                                                                                                                                                                                                                                                                                                            |

\*Fast breathing criteria: ≥ 60 bpm for < 2 months age; ≥ 50 bpm for 2 – 11 months age; ≥ 40 bpm for 12 – 59 months age

**LEMBAR CATATAN KLINIS STANDAR**

Tanggal kunjungan :   /   /     dd/mm/yyyy  
 Nama Anak : \_\_\_\_\_  
 ID peserta :   /     /  -    / I-PADS  
 Tanggal lahir anak :   /   /     dd/mm/yyyy

No. RM :                   
 Site : Puskesmas...../ BPM.....  
 Usia :   bulan/tahun (coret salah satu)

Nama Dokter : \_\_\_\_\_  
 Tanda tangan : \_\_\_\_\_

**Instruksi: Mohon lengkapi form ini dan lampirkan pada rekam medis anak di puskesmas/ BPM**

| Gejala utama                                                                                                                                                                                                                                                                                                                                                                                                                                                                                                                                                                                                                                                                                                                                                                                                                  | Tanda bahaya                                                                                                                                                                                                                                                                                                                                                                              | Berat badan                                                                                                                                                          | Pemeriksaan                                                                                                                                                                                                                                                                                                                                                            | Klasifikasi                                                                                                                                                           | Terapi                                                                                                                                                                                                                                                                                                                                                                       |
|-------------------------------------------------------------------------------------------------------------------------------------------------------------------------------------------------------------------------------------------------------------------------------------------------------------------------------------------------------------------------------------------------------------------------------------------------------------------------------------------------------------------------------------------------------------------------------------------------------------------------------------------------------------------------------------------------------------------------------------------------------------------------------------------------------------------------------|-------------------------------------------------------------------------------------------------------------------------------------------------------------------------------------------------------------------------------------------------------------------------------------------------------------------------------------------------------------------------------------------|----------------------------------------------------------------------------------------------------------------------------------------------------------------------|------------------------------------------------------------------------------------------------------------------------------------------------------------------------------------------------------------------------------------------------------------------------------------------------------------------------------------------------------------------------|-----------------------------------------------------------------------------------------------------------------------------------------------------------------------|------------------------------------------------------------------------------------------------------------------------------------------------------------------------------------------------------------------------------------------------------------------------------------------------------------------------------------------------------------------------------|
| <input type="checkbox"/> Demam, <input type="text"/> <input type="text"/> <input type="text"/> hari yang lalu<br><input type="checkbox"/> Pilek <input type="text"/> <input type="text"/> <input type="text"/> hari yang lalu<br><input type="checkbox"/> Batuk <input type="text"/> <input type="text"/> <input type="text"/> hari yang lalu<br><input type="checkbox"/> Napas Cepat* <input type="text"/> <input type="text"/> <input type="text"/> hari yang lalu<br><input type="checkbox"/> Mengi <input type="text"/> <input type="text"/> <input type="text"/> hari yang lalu<br><input type="checkbox"/> Diare <input type="text"/> <input type="text"/> <input type="text"/> hari yang lalu<br><input type="checkbox"/> Lainnya, _____ <input type="text"/> <input type="text"/> <input type="text"/> hari yang lalu | <input type="checkbox"/> Tidak ada<br><input type="checkbox"/> Tidak bisa menyusu/ makan-minum<br><input type="checkbox"/> Memuntahkan apapun<br><input type="checkbox"/> Lemah atau tidak sadarkan diri<br><input type="checkbox"/> Stridor dalam kondisi tenang<br><input type="checkbox"/> Sianosis<br><input type="checkbox"/> Gizi Buruk<br><input type="checkbox"/> Lain-lain _____ | <input type="text"/> <input type="text"/> <input type="text"/> Kg<br><hr/> <b>Panjang Badan</b><br><input type="text"/> <input type="text"/> <input type="text"/> cm | <b>Laju Napas/ RR dalam 1 menit penuh:</b><br><b>Hitungan 1*:</b><br><input type="text"/> <input type="text"/> <input type="text"/> /min<br><b>Hitungan 2 (jika meningkat)*</b><br><input type="text"/> <input type="text"/> <input type="text"/> /min<br><hr/> <b>Tarikan dinding dada ke dalam:</b><br><input type="checkbox"/> Ya<br><input type="checkbox"/> Tidak | <input type="checkbox"/> Bukan pneumonia<br><input type="checkbox"/> Pneumonia<br><input type="checkbox"/> Pneumonia berat<br><input type="checkbox"/> Lainnya, _____ | <input type="checkbox"/> Obat batuk, sebutkan _____<br><input type="checkbox"/> Antibiotik _____<br><input type="checkbox"/> Salbutamol Oral _____<br><input type="checkbox"/> Inhalation salbutamol _____<br><input type="checkbox"/> Steroid _____<br><input type="checkbox"/> Zinc _____<br><input type="checkbox"/> ORS _____<br><input type="checkbox"/> Lainnya, _____ |
| <b>Tindak lanjut:</b> <input type="checkbox"/> Rawat Jalan <input type="checkbox"/> Rawat Inap <input type="checkbox"/> Rujuk                                                                                                                                                                                                                                                                                                                                                                                                                                                                                                                                                                                                                                                                                                 |                                                                                                                                                                                                                                                                                                                                                                                           | <b>Tempat tindak lanjut:</b> _____                                                                                                                                   |                                                                                                                                                                                                                                                                                                                                                                        | <b>Inisial tim PRO:</b> _____<br><b>Tanda tangan tim PRO:</b> _____                                                                                                   |                                                                                                                                                                                                                                                                                                                                                                              |

**Admin checklist** : Catatan klinis  Terisi lengkap  sudah tercatat pada log catatan klinis  disimpan dalam file peserta

**Paraf Admin** : \_\_\_\_\_

\***Kriteria napas cepat:** ≥ 60 npm untuk usia < 2 bulan; ≥ 50 npm untuk usia 2 – 11 bulan; ≥ 40 npm untuk usia 12 – 59 bulan
